# Supplementary material for: Mandibular Overdenture Supported by Two or Four Unsplinted or Two Splinted Ti-Zr Mini-Implants: In Vitro Study of Peri-Implant and Edentulous Area Strains
Source: MDPI journal article supplement (doi:10.3390/biomimetics9030178), 2024-03-15
Supplement: s1 [file s1]

Supplementary Table S2a. MANOVA analysis with Effect Sizes ( $\eta^2$ ) for microstrains recorded from peri-implant right- and left-side vestibular and oral straingauges (SG) in the two-MDI models dependent on Splinting Status, Loading Position and Loading Force

| Source                                                    | Dependent Variable                        | Type III Sum of Squares   | df | Mean Square   | F         | P          | Partial Eta Squared ( $\eta^2$ ) |
|-----------------------------------------------------------|-------------------------------------------|---------------------------|----|---------------|-----------|------------|----------------------------------|
| Corrected Model                                           | Right side, vestibular SG (position 43) - | 54415241.609 <sup>a</sup> | 15 | 3627682.774   | 951.256   | <0.001**   | 0.985                            |
|                                                           | Right side, oral SG (position 43)         | 57163072.918 <sup>b</sup> | 15 | 3810871.528   | 322.467   | <0.001**   | 0.956                            |
|                                                           | Left side, vestibular SG (position 33)    | 26452545.532 <sup>c</sup> | 15 | 1763503.035   | 361.612   | <0.001**   | 0.960                            |
|                                                           | Left side, oral SG (position 33)          | 32199441.219 <sup>d</sup> | 15 | 2146629.415   | 607.444   | <0.001**   | 0.976                            |
| Intercept                                                 | Right side, vestibular SG (position 43) - | 279342740.508             | 1  | 279342740.508 | 73249.669 | <0.001**   | 0.997                            |
|                                                           | Right side, oral SG (position 43)         | 219803411.168             | 1  | 219803411.168 | 18599.255 | <0.001**   | 0.988                            |
|                                                           | Left side, vestibular SG (position 33)    | 222763952.059             | 1  | 222763952.059 | 45678.461 | <0.001**   | 0.995                            |
|                                                           | Left side, oral SG (position 33)          | 167528902.899             | 1  | 167528902.899 | 47406.630 | <0.001**   | 0.995                            |
| Splinting status                                          | Right side, vestibular SG (position 43) - | 12959.432                 | 1  | 12959.432     | 3.398     | 0.067 N.S. | 0.015                            |
|                                                           | Right side, oral SG (position 43)         | 214.732                   | 1  | 214.732       | .018      | 0.893 N.S. | 0.000                            |
|                                                           | Left side, vestibular SG (position 33)    | 218689.783                | 1  | 218689.783    | 44.843    | <0.001**   | 0.167                            |
|                                                           | Left side, oral SG (position 33)          | 22296.053                 | 1  | 22296.053     | 6.309     | 0.013 N.S. | 0.027                            |
| Loading Position                                          | Right side, vestibular SG (position 43) - | 40483827.534              | 2  | 20241913.767  | 5307.865  | <0.001**   | 0.979                            |
|                                                           | Right side, oral SG (position 43)         | 45732435.418              | 2  | 22866217.709  | 1934.886  | <0.001**   | 0.945                            |
|                                                           | Left side, vestibular SG (position 33)    | 13787562.741              | 2  | 6893781.371   | 1413.592  | <0.001**   | 0.927                            |
|                                                           | Left side, oral SG (position 33)          | 21153152.193              | 2  | 10576576.096  | 2992.915  | <0.001**   | 0.964                            |
| Loading Force                                             | Right side, vestibular SG (position 43) - | 7841291.551               | 2  | 3920645.776   | 1028.078  | <0.001**   | 0.902                            |
|                                                           | Right side, oral SG (position 43)         | 5386215.395               | 2  | 2693107.698   | 227.885   | <0.001**   | 0.670                            |
|                                                           | Left side, vestibular SG (position 33)    | 8506402.954               | 2  | 4253201.477   | 872.133   | <0.001**   | 0.886                            |
|                                                           | Left side, oral SG (position 33)          | 6671060.757               | 2  | 3335530.378   | 943.874   | <0.001**   | 0.894                            |
| Splinting status *<br>Loading Position                    | Right side, vestibular SG (position 43) - | 116552.968                | 2  | 58276.484     | 15.281    | <0.001**   | 0.120                            |
|                                                           | Right side, oral SG (position 43)         | 365442.171                | 2  | 182721.085    | 15.461    | <0.001**   | 0.121                            |
|                                                           | Left side, vestibular SG (position 33)    | 140621.745                | 2  | 70310.872     | 14.417    | <0.001**   | 0.114                            |
|                                                           | Left side, oral SG (position 33)          | 517253.784                | 2  | 258626.892    | 73.185    | <0.001**   | 0.395                            |
| Splinting status *<br>Loading Force                       | Right side, vestibular SG (position 43) - | 46384.344                 | 2  | 23192.172     | 6.081     | 0.003**    | 0.052                            |
|                                                           | Right side, oral SG (position 43)         | 76138.922                 | 2  | 38069.461     | 3.221     | 0.042*     | 0.028                            |
|                                                           | Left side, vestibular SG (position 33)    | 46522.564                 | 2  | 23261.282     | 4.770     | 0.009**    | 0.041                            |
|                                                           | Left side, oral SG (position 33)          | 281474.986                | 2  | 140737.493    | 39.825    | <0.001**   | 0.262                            |
| Loading Position *<br>Loading Force                       | Right side, vestibular SG (position 43) - | 403305.728                | 3  | 134435.243    | 35.252    | <0.001**   | 0.321                            |
|                                                           | Right side, oral SG (position 43)         | 403625.563                | 3  | 134541.854    | 11.385    | <0.001**   | 0.132                            |
|                                                           | Left side, vestibular SG (position 33)    | 209478.152                | 3  | 69826.051     | 14.318    | <0.001**   | 0.161                            |
|                                                           | Left side, oral SG (position 33)          | 367992.327                | 3  | 122664.109    | 34.711    | <0.001**   | 0.317                            |
| Splinting status *<br>Loading Position *<br>Loading Force | Right side, vestibular SG (position 43) - | 35217.074                 | 3  | 11739.025     | 3.078     | 0.028*     | 0.040                            |
|                                                           | Right side, oral SG (position 43)         | 128914.192                | 3  | 42971.397     | 3.636     | 0.014*Tab  | 0.046                            |
|                                                           | Left side, vestibular SG (position 33)    | 167819.168                | 3  | 55939.723     | 11.471    | <0.001**   | 0.133                            |
|                                                           | Left side, oral SG (position 33)          | 315403.251                | 3  | 105134.417    | 29.750    | <0.001**   | 0.285                            |

|                 |                                           |               |     |           |
|-----------------|-------------------------------------------|---------------|-----|-----------|
| Error           | Right side, vestibular SG (position 43) - | 854239.676    | 224 | 3813.570  |
|                 | Right side, oral SG (position 43)         | 2647200.842   | 224 | 11817.861 |
|                 | Left side, vestibular SG (position 33)    | 1092399.439   | 224 | 4876.783  |
|                 | Left side, oral SG (position 33)          | 791587.040    | 224 | 3533.871  |
| Total           | Right side, vestibular SG (position 43) - | 347098051.116 | 240 |           |
|                 | Right side, oral SG (position 43)         | 291285531.204 | 240 |           |
|                 | Left side, vestibular SG (position 33)    | 255768333.423 | 240 |           |
|                 | left side, oral SG (position 33)          | 206373682.201 | 240 |           |
| Corrected Total | Right side, vestibular SG (position 43) - | 55269481.285  | 239 |           |
|                 | Right side, oral SG (position 43)         | 59810273.760  | 239 |           |
|                 | Left side, vestibular SG (position 33)    | 27544944.971  | 239 |           |
|                 | left side, oral SG (position 33)          | 32991028.259  | 239 |           |

a. R Squared = .985 (Adjusted R Squared = .984)

b. R Squared = .956 (Adjusted R Squared = .953)

c. R Squared = .960 (Adjusted R Squared = .958)

d. R Squared = .976 (Adjusted R Squared = .974)

SG=straingauge; df=Degree of Freedom; \*\*=significant at  $p<0.01$ , \*=significant at  $p<0.05$ , N.S.= not significant ( $p>0.05$ )

Supplementary Table S2b. Post-hoc tests for Loading forces (the significance of the differences between peri-implant microstrains when the two MDIs were inserted dependent on different loading forces)

| Post-hoc tests: Loading forces (2-MDIs)   |               |       |                         |       |                      |                                                     |             |
|-------------------------------------------|---------------|-------|-------------------------|-------|----------------------|-----------------------------------------------------|-------------|
| Dependent Variable                        | Loading force |       | Mean Difference (I-J)   | SE    | $P^d$                | 95% Confidence Interval for Difference <sup>d</sup> |             |
|                                           |               |       |                         |       |                      | Lower Bound                                         | Upper Bound |
| Right side, vestibular SG (position 43) - | 50 N          | 100 N | -260.374 <sup>*</sup>   | 9.21  | <0.001 <sup>**</sup> | -282.52                                             | -238.23     |
|                                           |               | 150 N | -608.157 <sup>*,b</sup> | 10.29 | <0.001 <sup>**</sup> | -632.92                                             | -583.40     |
|                                           | 100 N         | 50 N  | 260.374 <sup>*</sup>    | 9.21  | <0.001 <sup>**</sup> | 238.23                                              | 282.52      |
|                                           |               | 150 N | -347.783 <sup>*,b</sup> | 10.29 | <0.001 <sup>**</sup> | -372.54                                             | -323.02     |
|                                           | 150 N         | 50 N  | 608.157 <sup>*,c</sup>  | 10.29 | <0.001 <sup>**</sup> | 583.40                                              | 632.92      |
|                                           |               | 100 N | 347.783 <sup>*,c</sup>  | 10.29 | <0.001 <sup>**</sup> | 323.02                                              | 372.54      |
|                                           | 50 N          | 100 N | -202.206 <sup>*</sup>   | 16.21 | <0.001 <sup>**</sup> | -241.19                                             | -163.22     |
|                                           |               | 150 N | -538.961 <sup>*,b</sup> | 18.12 | <0.001 <sup>**</sup> | -582.55                                             | -495.37     |
| Right side, oral SG (position 43)         | 100 N         | 50 N  | 202.206 <sup>*</sup>    | 16.21 | <0.001 <sup>**</sup> | 163.22                                              | 241.19      |
|                                           |               | 150 N | -336.755 <sup>*,b</sup> | 18.12 | <0.001 <sup>**</sup> | -380.34                                             | -293.17     |
|                                           | 150 N         | 50 N  | 538.961 <sup>*,c</sup>  | 18.12 | <0.001 <sup>**</sup> | 495.37                                              | 582.55      |
|                                           |               | 100 N | 336.755 <sup>*,c</sup>  | 18.12 | <0.001 <sup>**</sup> | 293.17                                              | 380.34      |
|                                           | 50 N          | 100 N | -260.504 <sup>*</sup>   | 10.41 | <0.001 <sup>**</sup> | -285.55                                             | -235.46     |
|                                           |               | 150 N | -573.561 <sup>*,b</sup> | 11.64 | <0.001 <sup>**</sup> | -601.56                                             | -545.56     |
| Left side, vestibular SG (position 33)    | 100 N         | 50 N  | 260.504 <sup>*</sup>    | 10.41 | <0.001 <sup>**</sup> | 235.46                                              | 285.55      |

|                                     |       |       |                             |       |          |         |         |
|-------------------------------------|-------|-------|-----------------------------|-------|----------|---------|---------|
| left side, oral SG<br>(position 33) | 150 N | 150 N | -<br>313.057 <sup>*,b</sup> | 11.64 | <0.001** | -341.06 | -285.06 |
|                                     |       | 50 N  | 573.561 <sup>*,c</sup>      | 11.64 | <0.001** | 545.56  | 601.56  |
|                                     |       | 100 N | 313.057 <sup>*,c</sup>      | 11.64 | <0.001** | 285.06  | 341.06  |
|                                     | 50 N  | 100 N | -270.915 <sup>*</sup>       | 8.86  | <0.001** | -292.23 | -249.60 |
|                                     |       | 150 N | -<br>508.540 <sup>*,b</sup> | 9.91  | <0.001** | -532.38 | -484.71 |
|                                     | 100 N | 50 N  | 270.915 <sup>*</sup>        | 8.86  | <0.001** | 249.60  | 292.23  |
|                                     |       | 150 N | -<br>237.626 <sup>*,b</sup> | 9.91  | <0.001** | -261.46 | -213.79 |
|                                     | 150 N | 50 N  | 508.540 <sup>*,c</sup>      | 9.91  | <0.001** | 484.71  | 532.38  |
|                                     |       | 100 N | 237.626 <sup>*,c</sup>      | 9.91  | <0.001** | 213.79  | 261.46  |

Based on estimated marginal means

\*. The mean difference is significant at the .05 level.

b. An estimate of the modified population marginal mean (J).

c. An estimate of the modified population marginal mean (I).

d. Adjustment for multiple comparisons: Sidak.

SE=standard error; P=significance, \*\*=p<0.01

Supplementary Table S2c. Post-hoc tests for Loading position (the significance of the differences between peri-implant microstrains in the 2-MDI models depending on different Loading position on the respective overdentures)

| Post-hos tests: Loading position (2 MDIs)    |                            |                            |                             |       |                 |                                                        |             |
|----------------------------------------------|----------------------------|----------------------------|-----------------------------|-------|-----------------|--------------------------------------------------------|-------------|
| Dependent Variable                           | Loading position           |                            | Mean<br>Difference<br>(I-J) | SE    | P. <sup>d</sup> | 95% Confidence Interval for<br>Difference <sup>d</sup> |             |
|                                              |                            |                            |                             |       |                 | Lower Bound                                            | Upper Bound |
| Right side, vestibular<br>SG (position 43) - | bilateral                  | frontal                    | 75.040 <sup>*,b</sup>       | 10.29 | <0.001**        | 50.28                                                  | 99.80       |
|                                              |                            | unilateral<br>(right side) | -872.042 <sup>*</sup>       | 9.21  | <0.001**        | -894.19                                                | -849.90     |
|                                              | frontal                    | bilateral                  | -75.040 <sup>*,c</sup>      | 10.29 | <0.001**        | -99.80                                                 | -50.28      |
|                                              |                            | unilateral<br>(right side) | -<br>947.081 <sup>*,c</sup> | 10.29 | <0.001**        | -971.84                                                | -922.32     |
|                                              | unilateral<br>(right side) | bilateral                  | 872.042 <sup>*</sup>        | 9.21  | <0.001**        | 849.90                                                 | 894.19      |
|                                              |                            | frontal                    | 947.081 <sup>*,b</sup>      | 10.29 | <0.001**        | 922.32                                                 | 971.84      |
| Right side, oral SG<br>(position 43)         | bilateral                  | frontal                    | 56.088 <sup>*,b</sup>       | 18.12 | 0.007**         | 12.50                                                  | 99.68       |
|                                              |                            | unilateral<br>(right side) | -926.953 <sup>*</sup>       | 16.21 | <0.001**        | -965.94                                                | -887.97     |
|                                              | frontal                    | bilateral                  | -56.088 <sup>*,c</sup>      | 18.12 | 0.007**         | -99.68                                                 | -12.50      |
|                                              |                            | unilateral<br>(right side) | -<br>983.041 <sup>*,c</sup> | 18.12 | <0.001**        | -1026.63                                               | -939.45     |
|                                              | unilateral<br>(right side) | bilateral                  | 926.953 <sup>*</sup>        | 16.21 | <0.001**        | 887.97                                                 | 965.94      |
|                                              |                            | frontal                    | 983.041 <sup>*,b</sup>      | 18.12 | <0.001**        | 939.45                                                 | 1026.63     |
| Left side, vestibular<br>SG (position 33)    | bilateral                  | frontal                    | 89.215 <sup>*,b</sup>       | 11.64 | <0.001**        | 61.22                                                  | 117.22      |
|                                              |                            | unilateral<br>(right side) | -512.312 <sup>*</sup>       | 10.41 | <0.001**        | -537.36                                                | -487.27     |
|                                              | frontal                    | bilateral                  | -89.215 <sup>*,c</sup>      | 11.64 | <0.001**        | -117.22                                                | -61.22      |
|                                              |                            | unilateral<br>(right side) | -<br>601.527 <sup>*,c</sup> | 11.64 | <0.001**        | -629.53                                                | -573.53     |
|                                              | unilateral<br>(right side) | bilateral                  | 512.312 <sup>*</sup>        | 10.41 | <0.001**        | 487.27                                                 | 537.36      |
|                                              |                            | frontal                    | 601.527 <sup>*,b</sup>      | 11.64 | <0.001**        | 573.53                                                 | 629.53      |

|                                     |                            |                            |                             |      |          |         |         |
|-------------------------------------|----------------------------|----------------------------|-----------------------------|------|----------|---------|---------|
| left side, oral SG<br>(position 33) | bilateral                  | frontal                    | 23.284 <sup>b</sup>         | 9.91 | .058     | -0.55   | 47.12   |
|                                     |                            | unilateral<br>(right side) | -644.277 <sup>*</sup>       | 8.86 | <0.001** | -665.60 | -622.96 |
|                                     | frontal                    | bilateral                  | -23.284 <sup>c</sup>        | 9.91 | .058     | -47.12  | 0.55    |
|                                     |                            | unilateral<br>(right side) | -<br>667.561 <sup>*,c</sup> | 9.91 | <0.001** | -691.40 | -643.73 |
|                                     | unilateral<br>(right side) | bilateral                  | 644.277 <sup>*</sup>        | 8.86 | <0.001** | 622.96  | 665.60  |
|                                     |                            | frontal                    | 667.561 <sup>*,b</sup>      | 9.91 | <0.001** | 643.73  | 691.40  |

Based on estimated marginal means

\*. The mean difference is significant at the .05 level.

b. An estimate of the modified population marginal mean (J).

c. An estimate of the modified population marginal mean (I).

d. Adjustment for multiple comparisons: Sidak.

SE=standard error; *P*=significance, p value; \*\*p<0.01

Supplementary Table S2d. Comparison of microstrains obtained from periimplant straingauges dependent on splinting status (splinted vs. unsplinted)

| Splinting status                             |                 |                 |                             |       |                       |                                                        |                |  |
|----------------------------------------------|-----------------|-----------------|-----------------------------|-------|-----------------------|--------------------------------------------------------|----------------|--|
| Dependent Variable                           |                 |                 | Mean<br>Difference<br>(I-J) | SE    | <i>P</i> <sup>d</sup> | 95% Confidence<br>Interval for Difference <sup>d</sup> |                |  |
|                                              |                 |                 |                             |       |                       | Lower<br>Bound                                         | Upper<br>Bound |  |
| Right side, vestibular SG<br>(position 43) - | not<br>splinted | splinted        | -10.872 <sup>a,b</sup>      | 7.97  | 0.17 N.S.             | -26.58                                                 | 4.84           |  |
|                                              | splinted        | not<br>splinted | 10.872 <sup>a,b</sup>       | 7.97  | 0.17 N.S.             | -4.84                                                  | 26.58          |  |
| Right side, oral SG<br>(position 43)         | not<br>splinted | splinted        | 2.942 <sup>a,b</sup>        | 14.03 | 0.83 N.S.             | -24.71                                                 | 30.60          |  |
|                                              | splinted        | not<br>splinted | -2.942 <sup>a,b</sup>       | 14.03 | 0.83 N.S.             | -30.60                                                 | 24.71          |  |
| Left side, vestibular SG<br>(position 33)    | not<br>splinted | splinted        | -58.169 <sup>a,b,*</sup>    | 9.02  | <0.01                 | -75.93                                                 | -40.40         |  |
|                                              | splinted        | not<br>splinted | 58.169 <sup>a,b,*</sup>     | 9.02  | <0.01                 | 40.40                                                  | 75.93          |  |
| left side, oral SG (position<br>33)          | not<br>splinted | splinted        | -11.342 <sup>a,b</sup>      | 7.67  | 0.14 N.S.             | -26.47                                                 | 3.78           |  |
|                                              | splinted        | not<br>splinted | 11.342 <sup>a,b</sup>       | 7.67  | 0.14 N.S.             | -3.78                                                  | 26.47          |  |

Based on estimated marginal means

\*. The mean difference is significant at the .05 level.

a. An estimate of the modified population marginal mean (I).

b. An estimate of the modified population marginal mean (J).

d. Adjustment for multiple comparisons: Sidak.

SE=standard error; *P*=significance, p value; N.S.=not significant
