# Supplementary material for: Mandibular Overdenture Supported by Two or Four Unsplinted or Two Splinted Ti-Zr Mini-Implants: In Vitro Study of Peri-Implant and Edentulous Area Strains
Source: MDPI journal article supplement (doi:10.3390/biomimetics9030178), 2024-03-15
Supplement: s1 [file s1]

**Table S1.** Periimplant microstrains obtained from straingauges around two unsplinted and two splinted Roxolid® miniimplants supporting mandibular overdenture loaded bilaterally, unilaterally and anteriorly with forces of 50, 100, and 150 N applied at the second premolar and first molar area

| Straingauge position                    | Splinting Status | Loading force | Loading position        | Mean    | Std. Deviation | N  |
|-----------------------------------------|------------------|---------------|-------------------------|---------|----------------|----|
| Right side, Vestibular SG (position 43) | not splinted     | 50 N          | bilateral               | 592.28  | 105.05         | 15 |
|                                         |                  |               | frontal                 | 544.89  | 47.55          | 15 |
|                                         |                  |               | unilateral (right side) | 1454.05 | 53.43          | 15 |
|                                         |                  | 100 N         | bilateral               | 803.64  | 56.50          | 15 |
|                                         |                  |               | frontal                 | 865.43  | 56.74          | 15 |
|                                         |                  |               | unilateral (right side) | 1629.88 | 55.87          | 15 |
|                                         |                  | 150 N         | bilateral               | 1051.32 | 63.96          | 15 |
|                                         |                  |               | unilateral (right side) | 1836.64 | 62.99          | 15 |
|                                         |                  |               |                         |         |                |    |
|                                         | splinted         | 50 N          | bilateral               | 519.08  | 46.11          | 15 |
|                                         |                  |               | frontal                 | 510.78  | 56.07          | 15 |
|                                         |                  |               | unilateral (right side) | 1497.06 | 60.99          | 15 |
|                                         |                  | 100 N         | bilateral               | 756.89  | 47.69          | 15 |
|                                         |                  |               | frontal                 | 956.54  | 59.85          | 15 |
|                                         |                  |               | unilateral (right side) | 1668.01 | 47.19          | 15 |
|                                         |                  | 150 N         | bilateral               | 1043.47 | 83.42          | 15 |
|                                         |                  |               | unilateral (right side) | 1913.29 | 56.91          | 15 |
|                                         |                  |               |                         |         |                |    |
| Right side, Oral SG (position 43)       | not splinted     | 50 N          | bilateral               | 556.04  | 79.90          | 15 |
|                                         |                  |               | frontal                 | 491.79  | 40.13          | 15 |
|                                         |                  |               | unilateral (right side) | 1334.25 | 73.37          | 15 |
|                                         |                  | 100 N         | bilateral               | 668.82  | 80.65          | 15 |
|                                         |                  |               | frontal                 | 679.00  | 57.27          | 15 |
|                                         |                  |               | unilateral (right side) | 1546.38 | 56.81          | 15 |
|                                         |                  | 150 N         | bilateral               | 865.50  | 68.22          | 15 |
|                                         |                  |               | unilateral (right side) | 1726.63 | 81.28          | 15 |
|                                         |                  |               |                         |         |                |    |
|                                         | splinted         | 50 N          | bilateral               | 488.66  | 69.38          | 15 |
|                                         |                  |               | frontal                 | 419.20  | 54.35          | 15 |
|                                         |                  |               | unilateral (right side) | 1339.14 | 345.29         | 15 |
|                                         |                  | 100 N         | bilateral               | 529.87  | 93.56          | 15 |
|                                         |                  |               | frontal                 | 779.63  | 54.67          | 15 |
|                                         |                  |               | unilateral (right side) | 1638.61 | 64.12          | 15 |
|                                         |                  | 150 N         | bilateral               | 782.08  | 79.63          | 15 |
|                                         |                  |               | unilateral (right side) | 1867.68 | 47.47          | 15 |
|                                         |                  |               |                         |         |                |    |

|                                              |                 |       |                         |         |        |    |
|----------------------------------------------|-----------------|-------|-------------------------|---------|--------|----|
| Left side,<br>Vestibular SG<br>(position 43) | not<br>splinted | 50 N  | bilateral               | 569.83  | 83.93  | 15 |
|                                              |                 |       | frontal                 | 551.59  | 82.63  | 15 |
|                                              |                 |       | unilateral (right side) | 1039.17 | 61.23  | 15 |
|                                              |                 | 100 N | bilateral               | 767.61  | 60.86  | 15 |
|                                              |                 |       | frontal                 | 829.93  | 53.55  | 15 |
|                                              |                 |       | unilateral (right side) | 1294.77 | 76.91  | 15 |
|                                              | splinted        | 150 N | bilateral               | 1071.21 | 53.40  | 15 |
|                                              |                 |       | unilateral (right side) | 1444.48 | 54.57  | 15 |
|                                              |                 | 50 N  | bilateral               | 614.36  | 36.77  | 15 |
|                                              |                 |       | frontal                 | 541.16  | 48.98  | 15 |
|                                              |                 |       | unilateral (right side) | 1088.36 | 129.26 | 15 |
|                                              |                 | 100 N | bilateral               | 765.03  | 55.92  | 15 |
|                                              |                 |       | frontal                 | 941.83  | 73.84  | 15 |
|                                              |                 |       | unilateral (right side) | 1368.32 | 77.61  | 15 |
|                                              |                 | 150 N | bilateral               | 1044.04 | 68.78  | 15 |
|                                              |                 |       | unilateral (right side) | 1670.83 | 47.94  | 15 |
| Left side,<br>oral SG<br>(position 44)       | not<br>splinted | 50 N  | bilateral               | 465.05  | 20.22  | 15 |
|                                              |                 |       | frontal                 | 504.75  | 64.34  | 15 |
|                                              |                 |       | unilateral (right side) | 994.98  | 57.58  | 15 |
|                                              |                 | 100 N | bilateral               | 690.80  | 64.17  | 15 |
|                                              |                 |       | frontal                 | 673.78  | 55.69  | 15 |
|                                              |                 |       | unilateral (right side) | 1267.99 | 34.62  | 15 |
|                                              | splinted        | 150 N | bilateral               | 824.68  | 78.46  | 15 |
|                                              |                 |       | unilateral (right side) | 1332.27 | 80.56  | 15 |
|                                              |                 | 50 N  | bilateral               | 412.04  | 63.65  | 15 |
|                                              |                 |       | frontal                 | 415.53  | 49.51  | 15 |
|                                              |                 |       | unilateral (right side) | 935.04  | 41.87  | 15 |
|                                              |                 | 100 N | bilateral               | 518.49  | 50.68  | 15 |
|                                              |                 |       | frontal                 | 769.51  | 49.51  | 15 |
|                                              |                 |       | unilateral (right side) | 1432.29 | 67.96  | 15 |
|                                              |                 | 150 N | bilateral               | 773.98  | 59.09  | 15 |
|                                              |                 |       | unilateral (right side) | 1588.15 | 78.91  | 15 |
