# Supplementary material for: Mandibular Overdenture Supported by Two or Four Unsplinted or Two Splinted Ti-Zr Mini-Implants: In Vitro Study of Peri-Implant and Edentulous Area Strains
Source: MDPI journal article supplement (doi:10.3390/biomimetics9030178), 2024-03-15
Supplement: s1 [file s1]

Supplementary Table S4a. MANOVA analysis with Effect Sizes ( $\eta^2$ ) for microstrains recorded from peri-implant right- and left-side vestibular and oral straingauges (SG) in the four-unsplinted-MDI model dependent on Loading Position and Loading Force

| Source             | Dependent Variable             | Type III Sum of Squares  | df | Mean Square  | F         | P       | Partial Eta Squared |
|--------------------|--------------------------------|--------------------------|----|--------------|-----------|---------|---------------------|
| Corrected Model    | Right side, vestibular SG (44) | 4457441.833 <sup>a</sup> | 7  | 636777.405   | 157.604   | <0.01** | 0.908               |
|                    | Right side, oral SG (44)       | 4921652.930 <sup>b</sup> | 7  | 703093.276   | 222.892   | <0.01** | 0.933               |
|                    | Left side, vestibular SG (34)  | 1625766.677 <sup>c</sup> | 7  | 232252.382   | 87.487    | <0.01** | 0.845               |
|                    | Left side, oral SG (34)        | 1139809.116 <sup>d</sup> | 7  | 162829.874   | 59.327    | <0.01** | 0.788               |
|                    | Right side, vestibular SG (42) | 2544374.526 <sup>e</sup> | 7  | 363482.075   | 138.486   | <0.01** | 0.896               |
|                    | Right side, oral SG (42)       | 2035312.586 <sup>f</sup> | 7  | 290758.941   | 122.666   | <0.01** | 0.885               |
|                    | Left side, vestibular SG (32)  | 3571091.808 <sup>g</sup> | 7  | 510155.973   | 232.777   | <0.01** | 0.936               |
|                    | Left side, oral SG (32)        | 2901662.012 <sup>h</sup> | 7  | 414523.145   | 201.907   | <0.01** | 0.927               |
| Intercept          | Right side, vestibular SG (44) | 50824425.773             | 1  | 50824425.773 | 12579.198 | <0.01** | 0.991               |
|                    | Right side, oral SG (44)       | 38781610.552             | 1  | 38781610.552 | 12294.380 | <0.01** | 0.991               |
|                    | Left side, vestibular SG (34)  | 30283049.942             | 1  | 30283049.942 | 11407.348 | <0.01** | 0.990               |
|                    | Left side, oral SG (34)        | 26193662.387             | 1  | 26193662.387 | 9543.607  | <0.01** | 0.988               |
|                    | Right side, vestibular SG (42) | 38873343.652             | 1  | 38873343.652 | 14810.666 | <0.01** | 0.992               |
|                    | Right side, oral SG (42)       | 29611207.274             | 1  | 29611207.274 | 12492.388 | <0.01** | 0.991               |
|                    | Left side, vestibular SG (32)  | 31711580.061             | 1  | 31711580.061 | 14469.575 | <0.01** | 0.992               |
|                    | Left side, oral SG (32)        | 25572152.952             | 1  | 25572152.952 | 12455.740 | <0.01** | 0.991               |
| Loading force      | Right side, vestibular SG (44) | 2160929.572              | 2  | 1080464.786  | 267.418   | <0.01** | 0.827               |
|                    | Right side, oral SG (44)       | 2475527.142              | 2  | 1237763.571  | 392.390   | <0.01** | 0.875               |
|                    | Left side, vestibular SG (34)  | 1333161.784              | 2  | 666580.892   | 251.095   | <0.01** | 0.818               |
|                    | Left side, oral SG (34)        | 982218.558               | 2  | 491109.279   | 178.935   | <0.01** | 0.762               |
|                    | Right side, vestibular SG (42) | 1468750.318              | 2  | 734375.159   | 279.795   | <0.01** | 0.833               |
|                    | Right side, oral SG (42)       | 1186864.621              | 2  | 593432.310   | 250.357   | <0.01** | 0.817               |
|                    | Left side, vestibular SG (32)  | 1358060.531              | 2  | 679030.265   | 309.833   | <0.01** | 0.847               |
|                    | Left side, oral SG (32)        | 1621541.499              | 2  | 810770.750   | 394.912   | <0.01** | 0.876               |
| Loading position   | Right side, vestibular SG (44) | 1118786.996              | 2  | 559393.498   | 138.452   | <0.01** | 0.712               |
|                    | Right side, oral SG (44)       | 1160408.239              | 2  | 580204.120   | 183.934   | <0.01** | 0.767               |
|                    | Left side, vestibular SG (34)  | 527578.159               | 2  | 263789.080   | 99.367    | <0.01** | 0.640               |
|                    | Left side, oral SG (34)        | 99293.517                | 2  | 49646.759    | 18.089    | <0.01** | 0.244               |
|                    | Right side, vestibular SG (42) | 1146264.026              | 2  | 573132.013   | 218.362   | <0.01** | 0.796               |
|                    | Right side, oral SG (42)       | 681333.790               | 2  | 340666.895   | 143.721   | <0.01** | 0.720               |
|                    | Left side, vestibular SG (32)  | 1641990.727              | 2  | 820995.364   | 374.609   | <0.01** | 0.870               |
|                    | Left side, oral SG (32)        | 745367.499               | 2  | 372683.750   | 181.528   | <0.01** | 0.764               |
| * Loading position | Right side, vestibular SG (44) | 68190.785                | 3  | 22730.262    | 5.626     | <0.01** | 0.131               |
|                    | Right side, oral SG (44)       | 8162.678                 | 3  | 2720.893     | .863      | 0.463   | 0.023               |
|                    | Left side, vestibular SG (34)  | 98373.104                | 3  | 32791.035    | 12.352    | <0.01** | 0.249               |
|                    | Left side, oral SG (34)        | 55553.307                | 3  | 18517.769    | 6.747     | <0.01** | 0.153               |
|                    | Right side, vestibular SG (42) | 91742.233                | 3  | 30580.744    | 11.651    | <0.01** | 0.238               |

|                    |                                |              |     |            |        |         |       |
|--------------------|--------------------------------|--------------|-----|------------|--------|---------|-------|
|                    | Right side, oral SG (42)       | 60222.428    | 3   | 20074.143  | 8.469  | <0.01** | 0.185 |
|                    | Left side, vestibular SG (32)  | 465304.691   | 3   | 155101.564 | 70.771 | <0.01** | 0.655 |
|                    | Left side, oral SG (32)        | 113931.213   | 3   | 37977.071  | 18.498 | <0.01** | 0.331 |
| Error              | Right side, vestibular SG (44) | 452519.755   | 112 | 4040.355   |        |         |       |
|                    | Right side, oral SG (44)       | 353294.796   | 112 | 3154.418   |        |         |       |
|                    | Left side, vestibular SG (34)  | 297326.051   | 112 | 2654.697   |        |         |       |
|                    | Left side, oral SG (34)        | 307398.478   | 112 | 2744.629   |        |         |       |
|                    | Right side, vestibular SG (42) | 293964.800   | 112 | 2624.686   |        |         |       |
|                    | Right side, oral SG (42)       | 265478.074   | 112 | 2370.340   |        |         |       |
|                    | Left side, vestibular SG (32)  | 245459.669   | 112 | 2191.604   |        |         |       |
|                    | Left side, oral SG (32)        | 229940.655   | 112 | 2053.042   |        |         |       |
| Total              | Right side, vestibular SG (44) | 57058821.899 | 120 |            |        |         |       |
|                    | Right side, oral SG (44)       | 44941623.272 | 120 |            |        |         |       |
|                    | Left side, vestibular SG (34)  | 31122461.544 | 120 |            |        |         |       |
|                    | Left side, oral SG (34)        | 27403245.926 | 120 |            |        |         |       |
|                    | Right side, vestibular SG (42) | 40988407.272 | 120 |            |        |         |       |
|                    | Right side, oral SG (42)       | 31783753.708 | 120 |            |        |         |       |
|                    | Left side, vestibular SG (32)  | 35606458.273 | 120 |            |        |         |       |
|                    | Left side, oral SG (32)        | 28667223.343 | 120 |            |        |         |       |
| Corrected<br>Total | Right side, vestibular SG (44) | 4909961.588  | 119 |            |        |         |       |
|                    | Right side, oral SG (44)       | 5274947.726  | 119 |            |        |         |       |
|                    | Left side, vestibular SG (34)  | 1923092.728  | 119 |            |        |         |       |
|                    | Left side, oral SG (34)        | 1447207.594  | 119 |            |        |         |       |
|                    | Right side, vestibular SG (42) | 2838339.326  | 119 |            |        |         |       |
|                    | Right side, oral SG (42)       | 2300790.659  | 119 |            |        |         |       |
|                    | Left side, vestibular SG (32)  | 3816551.477  | 119 |            |        |         |       |
|                    | Left side, oral SG (32)        | 3131602.667  | 119 |            |        |         |       |

a. R Squared = .908 (Adjusted R Squared = .902)

b. R Squared = .933 (Adjusted R Squared = .929)

c. R Squared = .845 (Adjusted R Squared = .836)

d. R Squared = .788 (Adjusted R Squared = .774)

e. R Squared = .896 (Adjusted R Squared = .890)

f. R Squared = .885 (Adjusted R Squared = .877)

g. R Squared = .936 (Adjusted R Squared = .932)

h. R Squared = .927 (Adjusted R Squared = .922)

df=Degree of freedom; *P*=Level of significance

Supplementary Table S4 b. Post-hoc tests for Loading forces in the four-MDI model (the significance of the differences between peri-implant microstrains when four MDIs were inserted dependent on different loading forces)

| Four MDI-model (Unsplinted MDIs) Post hoc test: loading forces |               |       |                         |       |                |                                                     |             |
|----------------------------------------------------------------|---------------|-------|-------------------------|-------|----------------|-----------------------------------------------------|-------------|
| Dependent Variable                                             | Loading force |       | Mean Difference (I-J)   | SE    | P <sup>d</sup> | 95% Confidence Interval for Difference <sup>d</sup> |             |
|                                                                |               |       |                         |       |                | Lower Bound                                         | Upper Bound |
| Right side, vestibular SG (position 44) -                      | 50 N          | 100 N | -158.797 <sup>*</sup>   | 13.40 | <0.01**        | -191.28                                             | -126.31     |
|                                                                |               | 150 N | -426.007 <sup>*,b</sup> | 14.98 | <0.01**        | -462.32                                             | -389.69     |
|                                                                | 100 N         | 50 N  | 158.797 <sup>*</sup>    | 13.40 | <0.01**        | 126.31                                              | 191.28      |
|                                                                |               | 150 N | -267.210 <sup>*,b</sup> | 14.98 | <0.01**        | -303.53                                             | -230.89     |
|                                                                | 150 N         | 50 N  | 426.007 <sup>*,c</sup>  | 14.98 | <0.01**        | 389.69                                              | 462.32      |
|                                                                |               | 100 N | 267.210 <sup>*,c</sup>  | 14.98 | <0.01**        | 230.89                                              | 303.53      |
| Right side, oral SG (position 44)                              | 50 N          | 100 N | -168.415 <sup>*</sup>   | 11.84 | <0.01**        | -197.12                                             | -139.71     |
|                                                                |               | 150 N | -456.283 <sup>*,b</sup> | 13.24 | <0.01**        | -488.37                                             | -424.19     |
|                                                                | 100 N         | 50 N  | 168.415 <sup>*</sup>    | 11.84 | <0.01**        | 139.71                                              | 197.12      |
|                                                                |               | 150 N | -287.868 <sup>*,b</sup> | 13.24 | <0.01**        | -319.96                                             | -255.78     |
|                                                                | 150 N         | 50 N  | 456.283 <sup>*,c</sup>  | 13.24 | <0.01**        | 424.19                                              | 488.37      |
|                                                                |               | 100 N | 287.868 <sup>*,c</sup>  | 13.24 | <0.01**        | 255.78                                              | 319.96      |
| Left side, vestibular SG (position 34)                         | 50 N          | 100 N | -114.474 <sup>*</sup>   | 10.86 | <0.01**        | -140.80                                             | -88.14      |
|                                                                |               | 150 N | -234.245 <sup>*,b</sup> | 12.14 | <0.01**        | -263.68                                             | -204.81     |
|                                                                | 100 N         | 50 N  | 114.474 <sup>*</sup>    | 10.86 | <0.01**        | 88.14                                               | 140.80      |
|                                                                |               | 150 N | -119.771 <sup>*,b</sup> | 12.14 | <0.01**        | -149.21                                             | -90.33      |
|                                                                | 150 N         | 50 N  | 234.245 <sup>*,c</sup>  | 12.14 | <0.01**        | 204.81                                              | 263.68      |
|                                                                |               | 100 N | 119.771 <sup>*,c</sup>  | 12.14 | <0.01**        | 90.33                                               | 149.21      |
| Left side, oral SG (position 34)                               | 50 N          | 100 N | -99.168 <sup>*</sup>    | 11.04 | <0.01**        | -125.94                                             | -72.40      |
|                                                                |               | 150 N | -233.817 <sup>*,b</sup> | 12.35 | <0.01**        | -263.75                                             | -203.89     |
|                                                                | 100 N         | 50 N  | 99.168 <sup>*</sup>     | 11.04 | <0.01**        | 72.40                                               | 125.94      |
|                                                                |               | 150 N | -134.649 <sup>*,b</sup> | 12.35 | <0.01**        | -164.58                                             | -104.72     |
|                                                                | 150 N         | 50 N  | 233.817 <sup>*,c</sup>  | 12.35 | <0.01**        | 203.89                                              | 263.75      |
|                                                                |               | 100 N | 134.649 <sup>*,c</sup>  | 12.35 | <0.01**        | 104.72                                              | 164.58      |
| Right side, vestibular SG (position 42)                        | 50 N          | 100 N | -116.753 <sup>*</sup>   | 10.80 | <0.01**        | -142.93                                             | -90.57      |
|                                                                |               | 150 N | -269.160 <sup>*,b</sup> | 12.08 | <0.01**        | -298.43                                             | -239.89     |
|                                                                | 100 N         | 50 N  | 116.753 <sup>*</sup>    | 10.80 | <0.01**        | 90.57                                               | 142.93      |
|                                                                |               | 150 N | -152.406 <sup>*,b</sup> | 12.08 | <0.01**        | -181.68                                             | -123.14     |
|                                                                | 150 N         | 50 N  | 269.160 <sup>*,c</sup>  | 12.08 | <0.01**        | 239.89                                              | 298.43      |
|                                                                |               | 100 N | 152.406 <sup>*,c</sup>  | 12.08 | <0.01**        | 123.14                                              | 181.68      |
| Right side, oral SG (position 42)                              | 50 N          | 100 N | -107.185 <sup>*</sup>   | 10.26 | <0.01**        | -132.06                                             | -82.31      |
|                                                                |               | 150 N | -268.096 <sup>*,b</sup> | 11.48 | <0.01**        | -295.91                                             | -240.28     |
|                                                                | 100 N         | 50 N  | 107.185 <sup>*</sup>    | 10.26 | <0.01**        | 82.31                                               | 132.06      |
|                                                                |               | 150 N | -160.911 <sup>*,b</sup> | 11.48 | <0.01**        | -188.73                                             | -133.10     |
|                                                                | 150 N         | 50 N  | 268.096 <sup>*,c</sup>  | 11.48 | <0.01**        | 240.28                                              | 295.91      |
|                                                                |               | 100 N | 160.911 <sup>*,c</sup>  | 11.48 | <0.01**        | 133.10                                              | 188.73      |
| Left side, vestibular SG (position 32)                         | 50 N          | 100 N | -163.314 <sup>*</sup>   | 9.87  | <0.01**        | -187.24                                             | -139.39     |
|                                                                |               | 150 N | -277.581 <sup>*,b</sup> | 11.03 | <0.01**        | -304.33                                             | -250.83     |
|                                                                | 100 N         | 50 N  | 163.314 <sup>*</sup>    | 9.87  | <0.01**        | 139.39                                              | 187.24      |

|                                     |       |       |                         |       |         |         |         |
|-------------------------------------|-------|-------|-------------------------|-------|---------|---------|---------|
|                                     |       | 150 N | -114.266 <sup>a,b</sup> | 11.03 | <0.01** | -141.01 | -87.52  |
|                                     | 150 N | 50 N  | 277.581 <sup>a,c</sup>  | 11.03 | <0.01** | 250.83  | 304.33  |
|                                     |       | 100 N | 114.266 <sup>a,c</sup>  | 11.03 | <0.01** | 87.52   | 141.01  |
|                                     | 50 N  | 100 N | -120.413 <sup>a</sup>   | 9.55  | <0.01** | -143.57 | -97.26  |
|                                     |       | 150 N | -336.381 <sup>a,b</sup> | 10.68 | <0.01** | -362.27 | -310.49 |
| Left side, oral SG<br>(position 32) | 100 N | 50 N  | 120.413 <sup>a</sup>    | 9.55  | <0.01** | 97.26   | 143.57  |
|                                     |       | 150 N | -215.969 <sup>a,b</sup> | 10.68 | <0.01** | -241.86 | -190.08 |
|                                     | 150 N | 50 N  | 336.381 <sup>a,c</sup>  | 10.68 | <0.01** | 310.49  | 362.27  |
|                                     |       | 100 N | 215.969 <sup>a,c</sup>  | 10.68 | <0.01** | 190.08  | 241.86  |

Based on estimated marginal means

\*. The mean difference is significant at the .05 level.

b. An estimate of the modified population marginal mean (J).

c. An estimate of the modified population marginal mean (I).

d. Adjustment for multiple comparisons: Sidak.

SE= Standard Error; P=significance, p value; \*\*=p<0.01

Supplementary Table S4 c. Post-hoc tests for Loading position in the four-MDI model (the significance of the differences between peri-implant microstrains when four MDIs were inserted dependent on different loading positions of the respective overdentures

| Four MDI-model (Unsplinted MDIs) Post hoc test: loading position |                         |                         |                         |                |                                                     |             |         |
|------------------------------------------------------------------|-------------------------|-------------------------|-------------------------|----------------|-----------------------------------------------------|-------------|---------|
| Dependent Variable                                               |                         | Mean Difference (I-J)   | SE                      | P <sup>d</sup> | 95% Confidence Interval for Difference <sup>d</sup> |             |         |
|                                                                  |                         |                         |                         |                | Lower Bound                                         | Upper Bound |         |
| Right side, vestibular SG (position 44) -                        | bilateral               | frontal                 | 222.656 <sup>*,b</sup>  | 14.98          | <0.01**                                             | 186.34      | 258.97  |
|                                                                  |                         | unilateral (right side) | -128.884 <sup>*</sup>   | 13.40          | <0.01**                                             | -161.37     | -96.40  |
|                                                                  | frontal                 | bilateral               | -222.656 <sup>*,c</sup> | 14.98          | <0.01**                                             | -258.97     | -186.34 |
|                                                                  |                         | unilateral (right side) | -351.540 <sup>*,c</sup> | 14.98          | <0.01**                                             | -387.86     | -315.22 |
|                                                                  | unilateral (right side) | bilateral               | 128.884 <sup>*</sup>    | 13.40          | <0.01**                                             | 96.40       | 161.37  |
|                                                                  |                         | frontal                 | 351.540 <sup>*,b</sup>  | 14.98          | <0.01**                                             | 315.22      | 387.86  |
| Right side, oral SG (position 44)                                | bilateral               | frontal                 | 249.856 <sup>*,b</sup>  | 13.24          | <0.01**                                             | 217.77      | 281.94  |
|                                                                  |                         | unilateral (right side) | -116.227 <sup>*</sup>   | 11.84          | <0.01**                                             | -144.93     | -87.53  |
|                                                                  | frontal                 | bilateral               | -249.856 <sup>*,c</sup> | 13.24          | <0.01**                                             | -281.94     | -217.77 |
|                                                                  |                         | unilateral (right side) | -366.083 <sup>*,c</sup> | 13.24          | <0.01**                                             | -398.17     | -333.99 |
|                                                                  | unilateral (right side) | bilateral               | 116.227 <sup>*</sup>    | 11.84          | <0.01**                                             | 87.53       | 144.93  |
|                                                                  |                         | frontal                 | 366.083 <sup>*,b</sup>  | 13.24          | <0.01**                                             | 333.99      | 398.17  |
| Left side, vestibular SG (position 34)                           | bilateral               | frontal                 | -102.885 <sup>*,b</sup> | 12.14          | <0.01**                                             | -132.32     | -73.45  |
|                                                                  |                         | unilateral (right side) | -52.618 <sup>*</sup>    | 10.86          | <0.01**                                             | -78.95      | -26.29  |
|                                                                  | frontal                 | bilateral               | 102.885 <sup>*,c</sup>  | 12.14          | <0.01**                                             | 73.45       | 132.32  |
|                                                                  |                         | unilateral (right side) | 50.267 <sup>*,c</sup>   | 12.14          | <0.01**                                             | 20.83       | 79.70   |
|                                                                  | unilateral (right side) | bilateral               | 52.618 <sup>*</sup>     | 10.86          | <0.01**                                             | 26.29       | 78.95   |
|                                                                  |                         | frontal                 | -50.267 <sup>*,b</sup>  | 12.14          | <0.01**                                             | -79.70      | -20.83  |
|                                                                  | bilateral               | frontal                 | 3.069 <sup>b</sup>      | 12.35          | 0.992                                               | -26.86      | 33.00   |

|                                               |                            |                            |                         |       |         |         |         |
|-----------------------------------------------|----------------------------|----------------------------|-------------------------|-------|---------|---------|---------|
| Left side, oral<br>SG (position 34)           |                            | unilateral<br>(right side) | -58.955*                | 11.04 | <0.01** | -85.73  | -32.18  |
|                                               | frontal                    | bilateral                  | -3.069 <sup>c</sup>     | 12.35 | 0.992   | -33.00  | 26.86   |
|                                               |                            | unilateral<br>(right side) | -62.024 <sup>*,c</sup>  | 12.35 | <0.01** | -91.96  | -32.09  |
|                                               | unilateral<br>(right side) | bilateral                  | 58.955*                 | 11.04 | <0.01** | 32.18   | 85.73   |
|                                               |                            | frontal                    | 62.024 <sup>*,b</sup>   | 12.35 | <0.01** | 32.09   | 91.96   |
| Right side,<br>vestibular SG<br>(position 42) | bilateral                  | frontal                    | -114.861 <sup>*,b</sup> | 12.08 | <0.01** | -144.13 | -85.59  |
|                                               |                            | unilateral<br>(right side) | -208.852*               | 10.80 | <0.01** | -235.03 | -182.67 |
|                                               | frontal                    | bilateral                  | 114.861 <sup>*,c</sup>  | 12.08 | <0.01** | 85.59   | 144.13  |
|                                               |                            | unilateral<br>(right side) | -93.991 <sup>*,c</sup>  | 12.08 | <0.01** | -123.26 | -64.72  |
|                                               | unilateral<br>(right side) | bilateral                  | 208.852*                | 10.80 | <0.01** | 182.67  | 235.03  |
| Right side, oral<br>SG (position 42)          |                            | frontal                    | 93.991 <sup>*,b</sup>   | 12.08 | <0.01** | 64.72   | 123.26  |
|                                               | bilateral                  | frontal                    | -18.020 <sup>b</sup>    | 11.48 | 0.317   | -45.84  | 9.80    |
|                                               |                            | unilateral<br>(right side) | -173.995*               | 10.26 | <0.01** | -198.87 | -149.12 |
|                                               | frontal                    | bilateral                  | 18.020 <sup>c</sup>     | 11.48 | 0.317   | -9.80   | 45.84   |
|                                               |                            | unilateral<br>(right side) | -155.975 <sup>*,c</sup> | 11.48 | <0.01** | -183.79 | -128.16 |
| Left side,<br>vestibular SG<br>(position 32)  | unilateral<br>(right side) | bilateral                  | 173.995*                | 10.26 | <0.01** | 149.12  | 198.87  |
|                                               |                            | frontal                    | 155.975 <sup>*,b</sup>  | 11.48 | <0.01** | 128.16  | 183.79  |
|                                               | bilateral                  | frontal                    | 203.703 <sup>*,b</sup>  | 11.03 | <0.01** | 176.96  | 230.45  |
|                                               |                            | unilateral<br>(right side) | 270.120*                | 9.87  | <0.01** | 246.20  | 294.04  |
|                                               | frontal                    | bilateral                  | -203.703 <sup>*,c</sup> | 11.03 | <0.01** | -230.45 | -176.96 |
| Left side, oral<br>SG (position 32)           |                            | unilateral<br>(right side) | 66.417 <sup>*,c</sup>   | 11.03 | <0.01** | 39.67   | 93.16   |
|                                               | unilateral<br>(right side) | bilateral                  | -270.120*               | 9.87  | <0.01** | -294.04 | -246.20 |
|                                               |                            | frontal                    | -66.417 <sup>*,b</sup>  | 11.03 | <0.01** | -93.16  | -39.67  |
|                                               | bilateral                  | frontal                    | 235.565 <sup>*,b</sup>  | 10.68 | <0.01** | 209.68  | 261.45  |
|                                               |                            | unilateral<br>(right side) | 171.365*                | 9.55  | <0.01** | 148.21  | 194.52  |
| Left side, oral<br>SG (position 32)           | frontal                    | bilateral                  | -235.565 <sup>*,c</sup> | 10.68 | <0.01** | -261.45 | -209.68 |
|                                               |                            | unilateral<br>(right side) | -64.200 <sup>*,c</sup>  | 10.68 | <0.01** | -90.09  | -38.31  |
|                                               | unilateral<br>(right side) | bilateral                  | -171.365*               | 9.55  | <0.01** | -194.52 | -148.21 |
|                                               |                            | frontal                    | 64.200 <sup>*,b</sup>   | 10.68 | <0.01** | 38.31   | 90.09   |

Based on estimated marginal means

\*. The mean difference is significant at the .05 level.

b. An estimate of the modified population marginal mean (J).

c. An estimate of the modified population marginal mean (I).

d. Adjustment for multiple comparisons: Sidak.

SE= Standard Error; P=significance, p value; \*\*=p<0.01
