# Supplementary material for: Mandibular Overdenture Supported by Two or Four Unsplinted or Two Splinted Ti-Zr Mini-Implants: In Vitro Study of Peri-Implant and Edentulous Area Strains
Source: MDPI journal article supplement (doi:10.3390/biomimetics9030178), 2024-03-15
Supplement: s1 [file s1]

**Supplementary Table S3.** Peri-implant microstrains obtained from four unsplinted Roxolid® miniimplants, supporting mandibular overdenture loaded bilaterally and unilaterally with forces of 50, 100, and 150 N

| <b>Straingauge position</b>                  | <b>Loading force</b> | <b>Loading position</b> | <b>Mean</b> | <b>Std. Deviation</b> | <b>N</b> |
|----------------------------------------------|----------------------|-------------------------|-------------|-----------------------|----------|
| <b>Right side, vestibular SG, site 44</b>    | 50 N                 | bilateral               | 473.25      | 83.98                 | 15       |
|                                              |                      | frontal                 | 402.72      | 41.17                 | 15       |
|                                              |                      | unilateral (right side) | 603.54      | 81.27                 | 15       |
|                                              | 100 N                | bilateral               | 677.70      | 74.17                 | 15       |
|                                              |                      | frontal                 | 485.08      | 44.68                 | 15       |
|                                              |                      | unilateral (right side) | 793.13      | 41.78                 | 15       |
|                                              | 150 N                | bilateral               | 848.72      | 61.22                 | 15       |
|                                              |                      | unilateral (right side) | 989.64      | 63.08                 | 15       |
| <b>Right side, oral SG, position 44</b>      | 50 N                 | bilateral               | 394.63      | 70.15                 | 15       |
|                                              |                      | frontal                 | 268.74      | 34.99                 | 15       |
|                                              |                      | unilateral (right side) | 529.77      | 77.02                 | 15       |
|                                              | 100 N                | bilateral               | 583.32      | 49.45                 | 15       |
|                                              |                      | frontal                 | 419.18      | 51.03                 | 15       |
|                                              |                      | unilateral (right side) | 695.88      | 59.33                 | 15       |
|                                              | 150 N                | bilateral               | 803.51      | 40.72                 | 15       |
|                                              |                      | unilateral (right side) | 904.48      | 54.12                 | 15       |
| <b>Left side, vestibular SG, position 34</b> | 50 N                 | bilateral               | 284.89      | 38.62                 | 15       |
|                                              |                      | frontal                 | 490.11      | 32.97                 | 15       |
|                                              |                      | unilateral (right side) | 400.39      | 42.72                 | 15       |
|                                              | 100 N                | bilateral               | 413.32      | 55.07                 | 15       |
|                                              |                      | frontal                 | 611.32      | 56.61                 | 15       |
|                                              |                      | unilateral (right side) | 494.16      | 72.07                 | 15       |
|                                              | 150 N                | bilateral               | 645.28      | 43.36                 | 15       |
|                                              |                      | unilateral (right side) | 606.80      | 59.34                 | 15       |
| <b>Left side, oral SG, position 34</b>       | 50 N                 | bilateral               | 314.14      | 35.72                 | 15       |
|                                              |                      | frontal                 | 380.28      | 40.34                 | 15       |
|                                              |                      | unilateral (right side) | 413.90      | 41.61                 | 15       |
|                                              | 100 N                | bilateral               | 410.17      | 71.29                 | 15       |
|                                              |                      | frontal                 | 501.06      | 39.01                 | 15       |
|                                              |                      | unilateral (right side) | 494.59      | 33.30                 | 15       |
|                                              | 150 N                | bilateral               | 606.92      | 48.84                 | 15       |
|                                              |                      | unilateral (right side) | 599.60      | 84.99                 | 15       |
| <b>Right side, vestibular SG, site 42</b>    | 50 N                 | bilateral               | 339.27      | 57.90                 | 15       |
|                                              |                      | frontal                 | 518.45      | 44.32                 | 15       |
|                                              |                      | unilateral (right side) | 500.58      | 31.07                 | 15       |
|                                              | 100 N                | bilateral               | 392.59      | 58.66                 | 15       |

|                                                  |       |                         |        |       |    |
|--------------------------------------------------|-------|-------------------------|--------|-------|----|
| <b>Right side,<br/>oral SG,<br/>position 42</b>  |       | frontal                 | 624.88 | 57.56 | 15 |
|                                                  |       | unilateral (right side) | 691.10 | 56.10 | 15 |
|                                                  | 150 N | bilateral               | 638.56 | 61.63 | 15 |
|                                                  |       | unilateral (right side) | 805.30 | 31.86 | 15 |
|                                                  | 50 N  | bilateral               | 296.57 | 45.76 | 15 |
|                                                  |       | frontal                 | 387.69 | 51.89 | 15 |
|                                                  |       | unilateral (right side) | 481.10 | 57.13 | 15 |
|                                                  | 100 N | bilateral               | 377.74 | 32.23 | 15 |
|                                                  |       | frontal                 | 500.19 | 57.17 | 15 |
|                                                  |       | unilateral (right side) | 609.00 | 38.59 | 15 |
|                                                  | 150 N | bilateral               | 603.45 | 45.85 | 15 |
|                                                  |       | unilateral (right side) | 709.65 | 54.90 | 15 |
| <b>Left side,<br/>vestibular SG,<br/>site 32</b> | 50 N  | bilateral               | 413.11 | 50.68 | 15 |
|                                                  |       | frontal                 | 434.74 | 35.86 | 15 |
|                                                  |       | unilateral (right side) | 304.33 | 34.03 | 15 |
|                                                  | 100 N | bilateral               | 723.16 | 67.40 | 15 |
|                                                  |       | frontal                 | 491.69 | 44.42 | 15 |
|                                                  |       | unilateral (right side) | 427.27 | 52.18 | 15 |
|                                                  | 150 N | bilateral               | 864.48 | 49.74 | 15 |
|                                                  |       | unilateral (right side) | 458.80 | 28.42 | 15 |
| <b>Left side,<br/>oral SG,<br/>position 32</b>   | 50 N  | bilateral               | 386.54 | 37.05 | 15 |
|                                                  |       | frontal                 | 303.89 | 36.11 | 15 |
|                                                  |       | unilateral (right side) | 305.71 | 25.90 | 15 |
|                                                  | 100 N | bilateral               | 576.33 | 46.51 | 15 |
|                                                  |       | frontal                 | 393.88 | 39.22 | 15 |
|                                                  |       | unilateral (right side) | 387.17 | 56.51 | 15 |
|                                                  | 150 N | bilateral               | 790.48 | 31.02 | 15 |
|                                                  |       | unilateral (right side) | 546.38 | 72.24 | 15 |
