# Supplementary material for: Mandibular Overdenture Supported by Two or Four Unsplinted or Two Splinted Ti-Zr Mini-Implants: In Vitro Study of Peri-Implant and Edentulous Area Strains
Source: MDPI journal article supplement (doi:10.3390/biomimetics9030178), 2024-03-15
Supplement: s1 [file s1]

Supplementary Table S5. Microstrains recorded from the right and left distal edentulous area (under mandibular overdenture saddles) during bilateral and unilateral (right side) loadings with 50 N, 100 N, and 150 N forces

| Straingauge position         | Loading position                | Splinting status | Loading force | Mean      | Std. Deviation | N  |
|------------------------------|---------------------------------|------------------|---------------|-----------|----------------|----|
| Right distal edentulous area | Bilateral loading               | not splinted     | 50 N          | 394.7289  | 66.99021       | 15 |
|                              |                                 |                  | 100 N         | 616.4494  | 82.75862       | 15 |
|                              |                                 |                  | 150 N         | 1054.9375 | 113.06787      | 15 |
|                              |                                 | splinted         | 50 N          | 455.7541  | 50.20826       | 15 |
|                              |                                 |                  | 100 N         | 648.0214  | 50.03079       | 15 |
|                              |                                 |                  | 150 N         | 925.1943  | 54.20093       | 15 |
|                              | unilateral loading (right side) | not splinted     | 50 N          | 920.9272  | 135.02035      | 15 |
|                              |                                 |                  | 100 N         | 1204.5317 | 128.14341      | 15 |
|                              |                                 |                  | 150 N         | 1360.1664 | 68.99931       | 15 |
|                              |                                 | splinted         | 50 N          | 709.4391  | 23.57164       | 15 |
|                              |                                 |                  | 100 N         | 902.5915  | 18.17774       | 15 |
|                              |                                 |                  | 150 N         | 1068.4393 | 59.32628       | 15 |
| Left distal edentulous area  | Bilateral loading               | not splinted     | 50 N          | 500.4302  | 504.67803      | 15 |
|                              |                                 |                  | 100 N         | 637.0740  | 60.60470       | 15 |
|                              |                                 |                  | 150 N         | 1083.6929 | 136.50435      | 15 |
|                              |                                 | splinted         | 50 N          | 425.6538  | 55.92623       | 15 |
|                              |                                 |                  | 100 N         | 645.2451  | 79.86795       | 15 |
|                              |                                 |                  | 150 N         | 959.1810  | 114.64353      | 15 |
|                              | unilateral loading (right side) | not splinted     | 50 N          | 582.3127  | 97.80366       | 15 |
|                              |                                 |                  | 100 N         | 655.1563  | 93.15064       | 15 |
|                              |                                 |                  | 150 N         | 756.9038  | 76.97516       | 15 |
|                              |                                 | splinted         | 50 N          | 134.8874  | 12.57018       | 15 |
|                              |                                 |                  | 100 N         | 274.6258  | 48.74310       | 15 |
|                              |                                 |                  | 150 N         | 413.7942  | 19.96682       | 15 |
