# Supplementary material for: Mandibular Overdenture Supported by Two or Four Unsplinted or Two Splinted Ti-Zr Mini-Implants: In Vitro Study of Peri-Implant and Edentulous Area Strains
Source: MDPI journal article supplement (doi:10.3390/biomimetics9030178), 2024-03-15
Supplement: s1 [file s1]

Supplementary Table S6. a-d. MANOVA analysis with Effect Sizes ( $\eta^2$ ) for microstrains recorded from straingauges bonded on the right and left posterior edentulous area in the two-MDI models dependent on Splinting Status, Loading Position and Loading Force

| Two-MDI models: MANOVA                              |            |                           |     |               |           |         |                     |
|-----------------------------------------------------|------------|---------------------------|-----|---------------|-----------|---------|---------------------|
| Strains from SGs in the Posterior Edentulous Area   |            | Type III Sum of Squares   | df  | Mean Square   | F         | P       | Partial Eta Squared |
| Corrected Model                                     | Right side | 14499250.422 <sup>a</sup> | 11  | 1318113.675   | 208.396   | <0.01** | 0.932               |
|                                                     | Left side  | 11851735.555 <sup>b</sup> | 11  | 1077430.505   | 39.568    | <0.01** | 0.722               |
| Intercept                                           | Right side | 131614787.990             | 1   | 131614787.990 | 20808.524 | <0.01** | 0.992               |
|                                                     | Left side  | 62462695.773              | 1   | 62462695.773  | 2293.918  | <0.01** | 0.932               |
| Loading position                                    | Right side | 5361351.461               | 1   | 5361351.461   | 847.639   | <0.01** | 0.835               |
|                                                     | Left side  | 2569000.319               | 1   | 2569000.319   | 94.346    | <0.01** | 0.360               |
| Splinting status                                    | Right side | 886839.992                | 1   | 886839.992    | 140.211   | <0.01** | 0.455               |
|                                                     | Left side  | 2319426.465               | 1   | 2319426.465   | 85.180    | <0.01** | 0.336               |
| Loading force                                       | Right side | 6982307.392               | 2   | 3491153.696   | 551.957   | <0.01** | 0.868               |
|                                                     | Left side  | 4740375.134               | 2   | 2370187.567   | 87.044    | <0.01** | 0.509               |
| Loading position * Splinting status                 | Right side | 737298.053                | 1   | 737298.053    | 116.568   | <0.01** | 0.410               |
|                                                     | Left side  | 1200372.879               | 1   | 1200372.879   | 44.083    | <0.01** | 0.208               |
| Loading position * Loading force                    | Right side | 336436.258                | 2   | 168218.129    | 26.596    | <0.01** | 0.240               |
|                                                     | Left side  | 913271.536                | 2   | 456635.768    | 16.770    | <0.01** | 0.166               |
| Splinting status * Loading force                    | Right side | 138317.761                | 2   | 69158.880     | 10.934    | <0.01** | 0.115               |
|                                                     | Left side  | 43133.207                 | 2   | 21566.603     | .792      | 0.455   | 0.009               |
| Loading position * Splinting status * Loading force | Right side | 56699.505                 | 2   | 28349.753     | 4.482     | 0.013*  | 0.051               |
|                                                     | Left side  | 66156.016                 | 2   | 33078.008     | 1.215     | 0.299   | 0.014               |
| Error                                               | Right side | 1062607.058               | 168 | 6325.042      |           |         |                     |
|                                                     | Left side  | 4574589.532               | 168 | 27229.700     |           |         |                     |
| Total                                               | Right side | 147176645.470             | 180 |               |           |         |                     |
|                                                     | Left side  | 78889020.860              | 180 |               |           |         |                     |
| Corrected Total                                     | Right side | 15561857.480              | 179 |               |           |         |                     |
|                                                     | Left side  | 16426325.087              | 179 |               |           |         |                     |

a. R Squared = .932 (Adjusted R Squared = .927)

b. R Squared = .722 (Adjusted R Squared = .703)

df=degree of freedom; P=Level of significance; \*\*<0.01; \*=<0.05

Supplementary Table 6 b. The significance of the differences of microstrains in the 2-MDI models recorded from strain gauges on the right and left edentulous area under denture saddles dependent on two different loading positions on the respective overdentures

| Two MDI models, Posterior Edentulous area: Loading position |                         |                         |                          |            |                       |                                                        |             |
|-------------------------------------------------------------|-------------------------|-------------------------|--------------------------|------------|-----------------------|--------------------------------------------------------|-------------|
| Edentulous area                                             | (I) Loading position    | (J) Loading place       | Mean<br>Difference (I-J) | Std. Error | <i>P</i> <sup>b</sup> | 95% Confidence Interval for<br>Difference <sup>b</sup> |             |
|                                                             |                         |                         |                          |            |                       | Lower Bound                                            | Upper Bound |
| Right side                                                  | bilateral               | unilateral (right side) | -345.168 <sup>*</sup>    | 11.856     | <0.01**               | -368.574                                               | -321.763    |
|                                                             | unilateral (right side) | bilateral               | 345.168 <sup>*</sup>     | 11.856     | <0.01**               | 321.763                                                | 368.574     |
| Left side                                                   | bilateral               | unilateral (right side) | 238.933 <sup>*</sup>     | 24.599     | <0.01**               | 190.370                                                | 287.496     |
|                                                             | unilateral (right side) | bilateral               | -238.933 <sup>*</sup>    | 24.599     | <0.01**               | -287.496                                               | -190.370    |

Based on estimated marginal means

\*. The mean difference is significant at the .05 level.

b. Adjustment for multiple comparisons: Sidak.

*P*=Level of significance; \*\*<0.01; \*=<0.05

Supplementary Table 6 c. Significance of the differences between microstrains recorded from strain gauges on the right and left edentulous area under denture saddles in the 2-MDI models dependent on Splinting status

| Two MDI models, Posterior Edentulous area: Splinting status |               |               |                          |            |                       |                                                        |             |
|-------------------------------------------------------------|---------------|---------------|--------------------------|------------|-----------------------|--------------------------------------------------------|-------------|
| Edentulous area                                             | (I) splintano | (J) splintano | Mean Difference<br>(I-J) | Std. Error | <i>P</i> <sup>b</sup> | 95% Confidence Interval for<br>Difference <sup>b</sup> |             |
|                                                             |               |               |                          |            |                       | Lower Bound                                            | Upper Bound |
| Right side                                                  | not splinted  | splinted      | 140.384 <sup>*</sup>     | 11.856     | <0.01**               | 116.978                                                | 163.789     |
|                                                             | splinted      | not splinted  | -140.384 <sup>*</sup>    | 11.856     | <0.01**               | -163.789                                               | -116.978    |
| Left side                                                   | not splinted  | splinted      | 227.030 <sup>*</sup>     | 24.599     | <0.01**               | 178.468                                                | 275.593     |
|                                                             | splinted      | not splinted  | -227.030 <sup>*</sup>    | 24.599     | <0.01**               | -275.593                                               | -178.468    |

Based on estimated marginal means

\*. The mean difference is significant at the .05 level.

b. Adjustment for multiple comparisons: Sidak.

*P*=Level of significance; \*\*<0.01

Supplementary Table 6 d. Post-hoc tests for the significance of the differences between microstrains in the 2-MDI models recorded from strain gauges on the right and left edentulous area under denture saddles dependent on different Loading forces

| Two MDI models, Posterior Edentulous area: post-hoc tests among loading forces |           |           |                          |            |                 |                                                        |             |
|--------------------------------------------------------------------------------|-----------|-----------|--------------------------|------------|-----------------|--------------------------------------------------------|-------------|
| Edentulous area                                                                | (I) Force | (J) Force | Mean Difference<br>(I-J) | Std. Error | P. <sup>b</sup> | 95% Confidence Interval for<br>Difference <sup>b</sup> |             |
|                                                                                |           |           |                          |            |                 | Lower Bound                                            | Upper Bound |
| Right side                                                                     | 50 N      | 100 N     | -222.686*                | 14.520     | <0.001**        | -257.706                                               | -187.667    |
|                                                                                |           | 150 N     | -481.972*                | 14.520     | <0.001**        | -516.991                                               | -446.953    |
|                                                                                | 100 N     | 50 N      | 222.686*                 | 14.520     | <0.001**        | 187.667                                                | 257.706     |
|                                                                                |           | 150 N     | -259.286*                | 14.520     | <0.001**        | -294.305                                               | -224.266    |
|                                                                                | 150 N     | 50 N      | 481.972*                 | 14.520     | <0.001**        | 446.953                                                | 516.991     |
|                                                                                |           | 100 N     | 259.286*                 | 14.520     | <0.001**        | 224.266                                                | 294.305     |
| Left side                                                                      | 50 N      | 100 N     | -142.204*                | 30.127     | <0.001**        | -214.865                                               | -69.544     |
|                                                                                |           | 150 N     | -392.572*                | 30.127     | <0.001**        | -465.232                                               | -319.912    |
|                                                                                | 100 N     | 50 N      | 142.204*                 | 30.127     | <0.001**        | 69.544                                                 | 214.865     |
|                                                                                |           | 150 N     | -250.368*                | 30.127     | <0.001**        | -323.028                                               | -177.707    |
|                                                                                | 150 N     | 50 N      | 392.572*                 | 30.127     | <0.001**        | 319.912                                                | 465.232     |
|                                                                                |           | 100 N     | 250.368*                 | 30.127     | <0.001**        | 177.707                                                | 323.028     |

Based on estimated marginal means  
\*. The mean difference is significant at the .05 level.  
b. Adjustment for multiple comparisons: Sidak.  
*P*=Level of significance; \*\*<0.01
