# Supplementary material for: Mandibular Overdenture Supported by Two or Four Unsplinted or Two Splinted Ti-Zr Mini-Implants: In Vitro Study of Peri-Implant and Edentulous Area Strains
Source: MDPI journal article supplement (doi:10.3390/biomimetics9030178), 2024-03-15
Supplement: s1 [file s1]

Supplementary Table S7a. Four single unit (unsplinted) MDI model; microstrains from the right and left distal edentulous area (under mandibular overdenture saddles) during bilateral and unilateral (right side) loadings with 50 N, 100 N, and 150 N forces applied at the second premolar and first molar area

| Straingauge position                  | Loading Force | Loading place             | Mean    | Std. Deviation | N  |
|---------------------------------------|---------------|---------------------------|---------|----------------|----|
| Distal edentulous area:<br>right side | 50 N          | bilaterally               | 400.86  | 55.53          | 15 |
|                                       |               | unilaterally (right side) | 739.48  | 70.94          | 15 |
|                                       | 100 N         | <i>bilaterally</i>        | 835.99  | 55.33          | 15 |
|                                       |               | unilaterally (right side) | 893.93  | 68.64          | 15 |
|                                       | 150 N         | bilaterally               | 924.15  | 70.67          | 15 |
|                                       |               | unilaterally (right side) | 1019.08 | 59.43          | 15 |
| Distal edentulous area:<br>left side  | 50 N          | bilaterally               | 494.38  | 74.63          | 15 |
|                                       |               | unilaterally (right side) | 413.15  | 63.84          | 15 |
|                                       | 100 N         | bilaterally               | 811.99  | 59.81          | 15 |
|                                       |               | unilaterally (right side) | 475.09  | 70.94          | 15 |
|                                       | 150 N         | bilaterally               | 904.81  | 64.31          | 15 |
|                                       |               | unilaterally (right side) | 547.00  | 113.19         | 15 |

Supplementary Table S7b. MANOVA with Effect Sizes ( $\eta^2$ ) for microstrains recorded from straingauges bonded on the right and left posterior edentulous area in the four-MDI model dependent on Splinting Status and Loading Position

**Strains registered from posterior edentulous area during overdenture loading in the Four-MDI single-unit model: MANOVA**

| Source           | Posterior edentulous area | Type III Sum of Squares  | df | Mean Square | F        | Sig.    | Partial Eta Squared |
|------------------|---------------------------|--------------------------|----|-------------|----------|---------|---------------------|
| Corrected Model  | Right side                | 3547086.343 <sup>a</sup> | 5  | 709417.27   | 174.34   | <0.01** | 0.912               |
|                  | Left side                 | 3029551.821 <sup>b</sup> | 5  | 605910.36   | 103.27   | <0.01** | 0.860               |
| Intercept        | Right side                | 57923804.307             | 1  | 57923804.31 | 14234.45 | <0.01** | 0.994               |
|                  | Left side                 | 33240974.984             | 1  | 33240974.98 | 5665.49  | <0.01** | 0.985               |
| Loading position | Right side                | 603892.689               | 1  | 603892.69   | 148.40   | <0.01** | 0.639               |
|                  | Left side                 | 1505211.083              | 1  | 1505211.08  | 256.54   | <0.01** | 0.753               |
| Loading force    | Right side                | 2594347.523              | 2  | 1297173.76  | 318.77   | <0.01** | 0.884               |
|                  | Left side                 | 1168586.088              | 2  | 584293.04   | 99.59    | <0.01** | 0.703               |

|                                     |            |              |    |           |       |         |       |
|-------------------------------------|------------|--------------|----|-----------|-------|---------|-------|
| Loading position<br>* Loading force | Right side | 348846.130   | 2  | 174423.07 | 42.86 | <0.01** | 0.505 |
|                                     | Left side  | 355754.650   | 2  | 177877.33 | 30.32 | <0.01** | 0.419 |
| Error                               | Right side | 341818.558   | 84 | 4069.27   |       |         |       |
|                                     | Left side  | 492850.574   | 84 | 5867.27   |       |         |       |
| Total                               | Right side | 61812709.208 | 90 |           |       |         |       |
|                                     | Left side  | 36763377.378 | 90 |           |       |         |       |
| Corrected Total                     | Right side | 3888904.901  | 89 |           |       |         |       |
|                                     | Left side  | 3522402.395  | 89 |           |       |         |       |

a. R Squared = .912 (Adjusted R Squared = .907)  
df=degree of freedom, P=Level of significance; \*\*=p<0.01

Supplementary Table S7c. The significance of the differences between microstrains recorded from the right and left edentulous area under denture saddles in the 4-MDI model when the overdenture was loaded at two different loading positions

**Significance of the differences for mean microstrain values registered from posterior edentulous area in the four-MDI unsplinted model dependent on Loading position**

| Dependent Variable | Loading position        |                         | Mean Difference (I-J) | Std. Error | P. <sup>b</sup> | 95% Confidence Interval for Difference <sup>b</sup> |             |
|--------------------|-------------------------|-------------------------|-----------------------|------------|-----------------|-----------------------------------------------------|-------------|
|                    |                         |                         |                       |            |                 | Lower Bound                                         | Upper Bound |
| Right side         | bilateral               | unilateral (right side) | -163.828*             | 13.45      | <0.01**         | -190.57                                             | -137.08     |
|                    | unilateral (right side) | bilateral               | 163.828*              | 13.45      | <0.01**         | 137.08                                              | 190.57      |
| Left side          | bilateral               | unilateral (right side) | 258.647*              | 16.15      | <0.01**         | 226.53                                              | 290.76      |
|                    | unilateral (right side) | bilateral               | -258.647*             | 16.15      | <0.01**         | -290.76                                             | -226.53     |

Based on estimated marginal means

\*. The mean difference is significant at the .05 level.

b. Adjustment for multiple comparisons: Sidak.

Df=degree of freedom, P=Level of significance; \*\*=p<0.01

Supplementary Table S7d. The significance of the differences (post-hoc tests) between microstrains in the 4-MDI model recorded from strain gauges on the right and left edentulous area under denture saddles when the overdenture was loaded with three different loading forces

| Post hoc tests for loading force (strains from posterior edentulous area in the four-MDI unsplinted model) |               |       |                       |            |                     |                                                     |             |
|------------------------------------------------------------------------------------------------------------|---------------|-------|-----------------------|------------|---------------------|-----------------------------------------------------|-------------|
| Dependent Variable                                                                                         | Loading Force |       | Mean Difference (I-J) | Std. Error | P. <sup>b</sup>     | 95% Confidence Interval for Difference <sup>b</sup> |             |
|                                                                                                            |               |       |                       |            |                     | Lower Bound                                         | Upper Bound |
| Right side posterior edentulous area                                                                       | 50 N          | 100 N | -294.791 <sup>*</sup> | 16.47      | <0.01 <sup>**</sup> | -334.92                                             | -254.66     |
|                                                                                                            |               | 150 N | -401.445 <sup>*</sup> | 16.47      | <0.01 <sup>**</sup> | -441.57                                             | -361.32     |
|                                                                                                            | 100 N         | 50 N  | 294.791 <sup>*</sup>  | 16.47      | <0.01 <sup>**</sup> | 254.66                                              | 334.92      |
|                                                                                                            |               | 150 N | -106.654 <sup>*</sup> | 16.47      | <0.01 <sup>**</sup> | -146.78                                             | -66.53      |
|                                                                                                            | 150 N         | 50 N  | 401.445 <sup>*</sup>  | 16.47      | <0.01 <sup>**</sup> | 361.32                                              | 441.57      |
|                                                                                                            |               | 100 N | 106.654 <sup>*</sup>  | 16.47      | <0.01 <sup>**</sup> | 66.53                                               | 146.78      |
| Left side posterior edentulous area                                                                        | 50 N          | 100 N | -189.776 <sup>*</sup> | 19.78      | <0.01 <sup>**</sup> | -237.96                                             | -141.59     |
|                                                                                                            |               | 150 N | -272.140 <sup>*</sup> | 19.78      | <0.01 <sup>**</sup> | -320.32                                             | -223.96     |
|                                                                                                            | 100 N         | 50 N  | 189.776 <sup>*</sup>  | 19.78      | <0.01 <sup>**</sup> | 141.59                                              | 237.96      |
|                                                                                                            |               | 150 N | -82.363 <sup>*</sup>  | 19.78      | <0.01 <sup>**</sup> | -130.55                                             | -34.18      |
|                                                                                                            | 150 N         | 50 N  | 272.140 <sup>*</sup>  | 19.78      | <0.01 <sup>**</sup> | 223.96                                              | 320.32      |
|                                                                                                            |               | 100 N | 82.363 <sup>*</sup>   | 19.78      | <0.01 <sup>**</sup> | 34.18                                               | 130.55      |

Based on estimated marginal means

\*. The mean difference is significant at the .05 level.

b. Adjustment for multiple comparisons: Sidak.

df=degree of freedom, P=Level of significance; \*\*=p<0.01
